# Supplementary material
Source: Springer Nature journal article supplement (https://www.springermedizin.de/resource/supplementary/13063_2013_1381_MOESM1_ESM.pdf/9619906)
Supplement: MOESM1 [file 9619906]

**RECRUITMENT**  
Enrollment

**WRITTEN INFORMED CONSENT**

**BASELINE ASSESSMENT**  
Testing at days 1 and 2

**RANDOMIZATION**

**TELEREHABILITATION GROUP**  
e-CUIDATE program  
(n=40)

**CONTROL GROUP**  
Usual care  
(n=40)

4 weeks follow-up assessment

8 weeks post-intervention assessment

24 weeks detraining assessment

4 weeks follow-up assessment

8 weeks post-intervention assessment

24 weeks detraining assessment
